# Supplementary material for: Thermal management of chips by a device prototype using synergistic effects of 3-D heat-conductive network and electrocaloric refrigeration
Source: PubMed Central journal article supplement (PMC9532434; doi:10.1038/s41467-022-33596-z), 2022-10-04
Supplement: 41467_2022_33596_MOESM3_ESM.pdf [file 41467_2022_33596_MOESM3_ESM.pdf]

## **Description of Additional Supplementary Files**

### **Supplementary Movie 1**

The movie of the dynamic evolution of temperature versus time during heating and cooling.

### **Supplementary Movie 2**

The movie of electrocaloric cooling device operating at low frequency (1 Hz).

### **Supplementary Movie 3**

The movie of electrocaloric cooling device operating at low frequency (5 Hz).
